# Supplementary material for: Prior exposure to Bordetella species as an exclusion criterion in the baboon model of pertussis
Source: PubMed Central journal article supplement — J Vet Med Sci. 2016 Sep 26;79(1):60–4. doi: 10.1292/jvms.16-0427 (PMC5289237; doi:10.1292/jvms.16-0427), 2016-09-26
Supplement: jvms-79-060-s001.pdf [file jvms-79-060-s001.pdf]

Supplementary Table 1. Details of WBC, colonization, and ELISA tests for each baboon.

| Baboon | Active <i>B. br</i> infection | Day 0                  | Day 2/3                           |                   | Day 9/10               |                              |                        | response to pertussis infection |
|--------|-------------------------------|------------------------|-----------------------------------|-------------------|------------------------|------------------------------|------------------------|---------------------------------|
|        |                               | anti-Fha titer (IU/ml) | WBC ( $\times 1000/\mu\text{l}$ ) | CFU/ml            | anti-Fha titer (IU/ml) | anti- Bp LOS titer (raw abs) | anti-PTx titer (IU/ml) |                                 |
| Sigma  | n/a                           | 90 $\pm$ 12            | n/a                               | n/a               | n/a                    | n/a                          | n/a                    | n/a                             |
| C1     | -                             | 3 $\pm$ 1              | 18.41                             | 8.0 $\times 10^7$ | 3 $\pm$ 2              | 0.06 $\pm$ 0.01              | 0.03 $\pm$ 0.02        | typical                         |
| C2     | yes                           | 3.4 $\pm$ 0.5          | 19.26                             | 3.5 $\times 10^7$ | 3.1 $\pm$ 0.5          | 0.08 $\pm$ 0.01              | 0.02 $\pm$ 0.01        | excluded                        |
| C3     | yes                           | 0.54 $\pm$ 0.09        | 5.11                              | 1.8 $\times 10^7$ | 1.7 $\pm$ 0.8          | 0.09 $\pm$ 0.01              | 0.3 $\pm$ 0.3          | excluded                        |
| C4     | yes*                          | 14 $\pm$ 6             | 12.61                             | 1.0 $\times 10^3$ | 518 $\pm$ 456          | 0.41 $\pm$ 0.02              | 4 $\pm$ 2              | excluded                        |
| C5     | -                             | 20 $\pm$ 2             | 6.65                              | 5                 | 647 $\pm$ 254          | 0.39 $\pm$ 0.01              | 119 $\pm$ 27           | atypical                        |
| C6     | -                             | 0 $\pm$ 0              | 33.58                             | 3.0 $\times 10^7$ | 0.7 $\pm$ 0.2          | 0.06 $\pm$ 0.01              | 0.16 $\pm$ 0.04        | typical                         |
| C7     | -                             | 0.6 $\pm$ 0.3          | 27.56                             | 1.8 $\times 10^7$ | 1.1 $\pm$ 0.6          | 0.06 $\pm$ 0.01              | 0.01 $\pm$ 0.01        | typical                         |
| T1     | -                             | 119 $\pm$ 36           | 7.96                              | 6.5 $\times 10^4$ | 185 $\pm$ 117          | 0.22 $\pm$ 0.04              | nd                     | atypical                        |
| T2     | -                             | 135 $\pm$ 37           | 6.85                              | 3.0 $\times 10^4$ | 301 $\pm$ 41           | 0.40 $\pm$ 0.08              | nd                     | atypical                        |
| T3     | -                             | 39 $\pm$ 2             | 6.33                              | 1.0 $\times 10^4$ | 1416 $\pm$ 254         | 0.54 $\pm$ 0.02              | nd                     | atypical                        |
| T4     | -                             | 22 $\pm$ 10            | 8.36                              | 6.0 $\times 10^3$ | 690 $\pm$ 239          | 0.38 $\pm$ 0.04              | nd                     | atypical                        |
| T5     | yes                           | 52 $\pm$ 16            | 28.38                             | 1.5 $\times 10^3$ | 1269 $\pm$ 406         | 0.27 $\pm$ 0.07              | nd                     | excluded                        |
| T6     | -                             | 5 $\pm$ 2              | 23.03                             | 1.7 $\times 10^4$ | 378 $\pm$ 113          | 0.21 $\pm$ 0.04              | nd                     | atypical                        |
| T7     | -                             | 0.8 $\pm$ 0.3          | 30.31                             | 3.8 $\times 10^7$ | 1.2 $\pm$ 0.4          | 0.07 $\pm$ 0.01              | nd                     | typical                         |
| T8     | -                             | 0.2 $\pm$ 0.1          | 14.24                             | 1.3 $\times 10^8$ | 5 $\pm$ 2              | 0.09 $\pm$ 0.02              | nd                     | typical                         |

*B. br* = *B. bronchiseptica*; - = no evidence of *B. br*; n/a = not applicable; \* = *B. br* confirmed by standard microbiological procedures; nd = no data

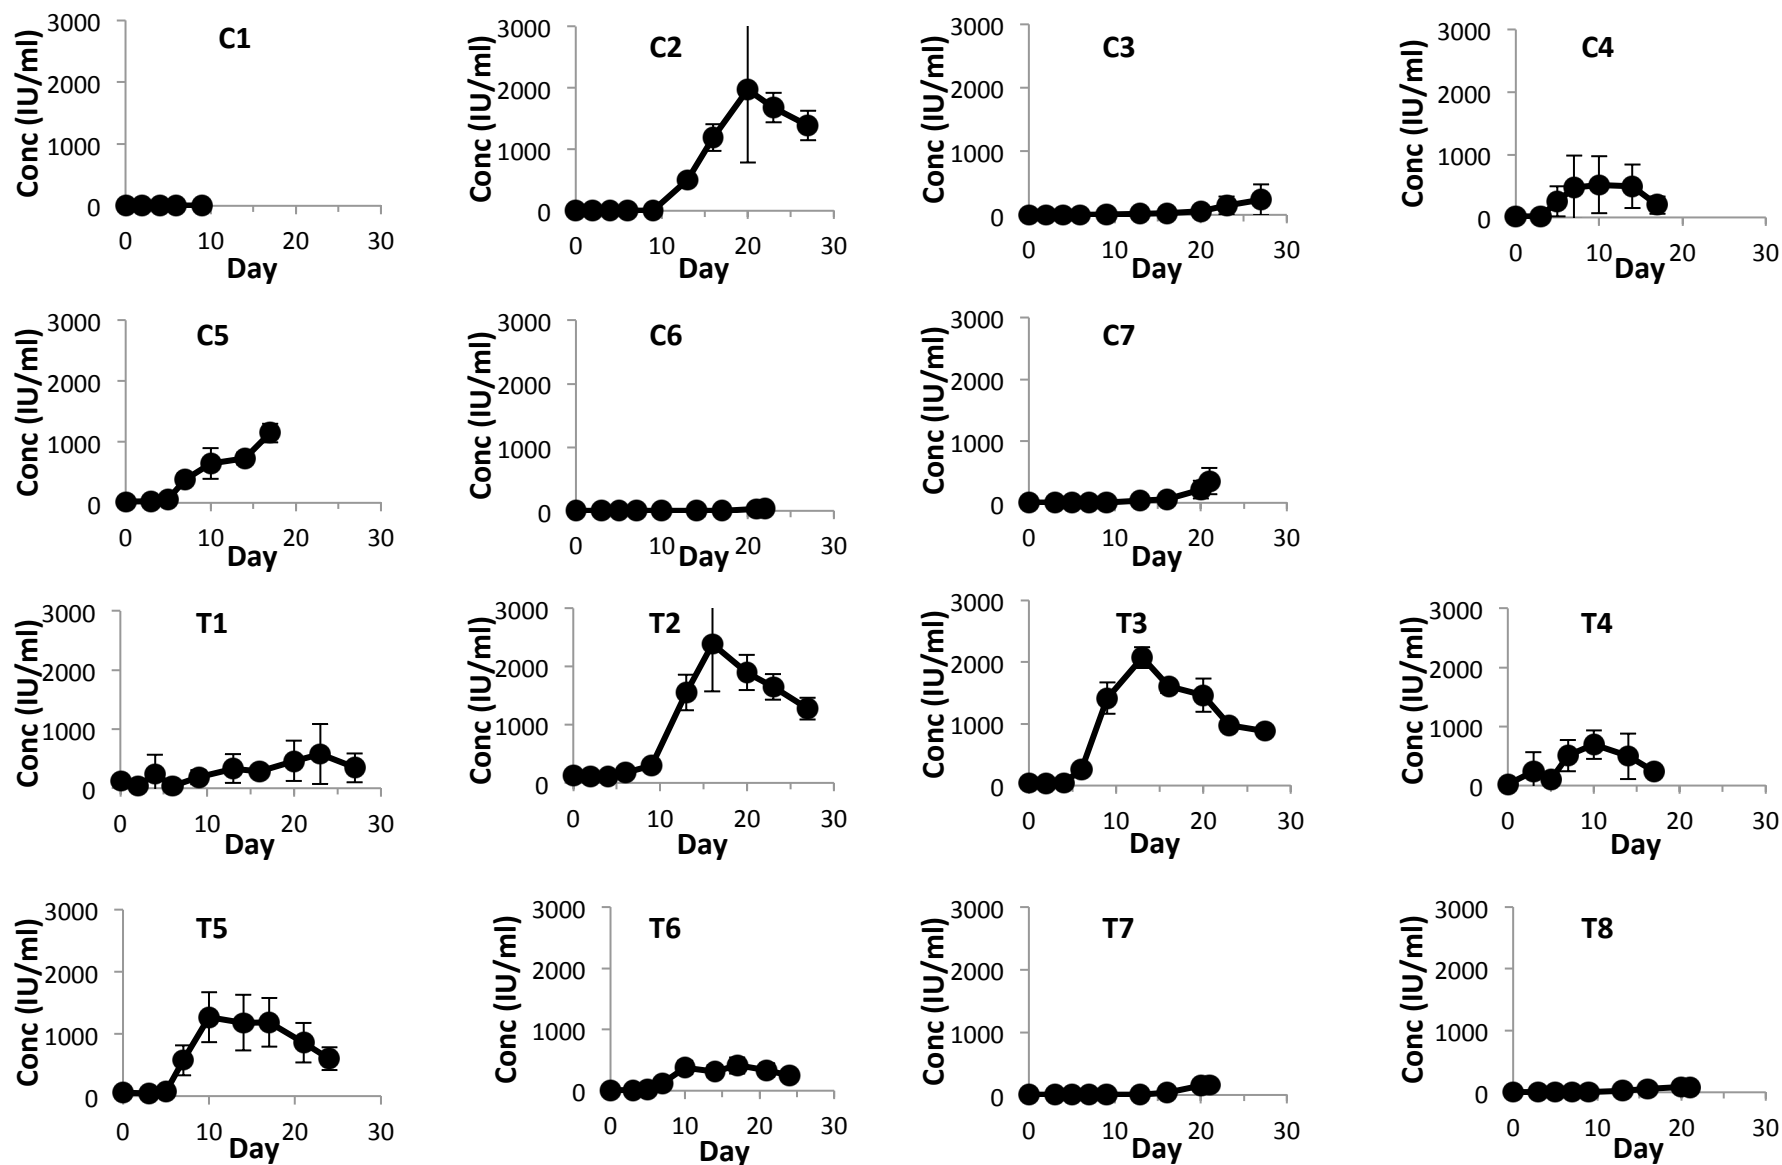

**Supplementary Figure 1. Anti-Fha antibody titer as measured by ELISA.** Baboon serum samples were analyzed on the day indicated in duplicate with 8 x 5-fold dilutions. Each plate contained a control antibody or serum that had been normalized relative to the WHO 06/142 reference serum. Fits of the serum data were compared to the control to determine anti-Fha antibody concentrations in IU/ml.

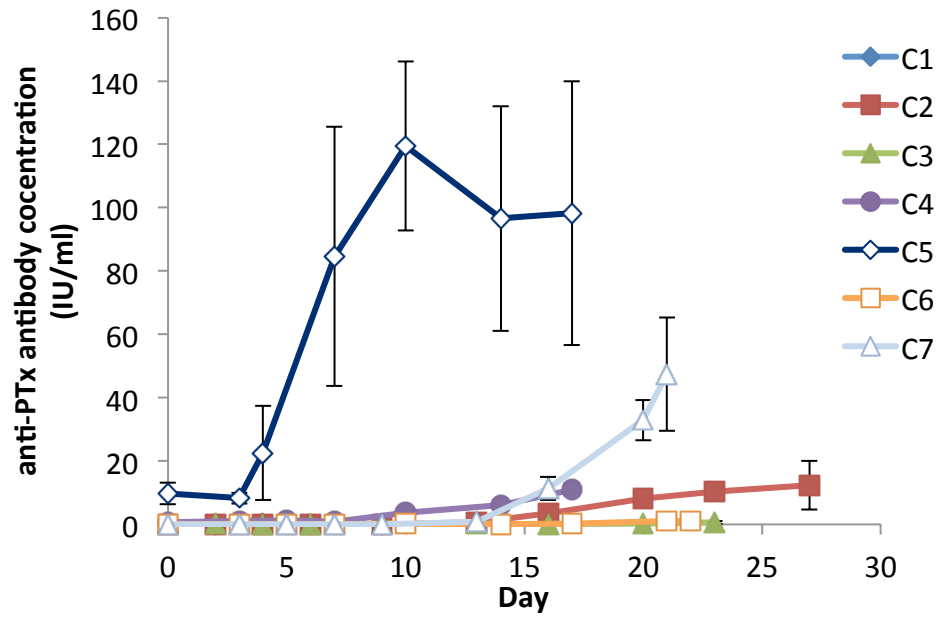

**Supplementary Figure 2. Anti-PTx antibody titer as measured by ELISA.** Baboon serum samples were analyzed on the day indicated in duplicate with 8 x 5-fold dilutions. Each plate contained a control antibody that had been normalized relative to the WHO 06/142 reference serum. Fits of the serum data were compared to the control to determine anti-PTx antibody concentrations in IU/ml.
